# Supplementary material for: Functions of the Hha and YdgT Proteins in Transcriptional Silencing by the Nucleoid Proteins, H-NS and StpA, in Escherichia coli
Source: PubMed Central journal article supplement — DNA Res. 2013 Mar 29;20(3):263–71. doi: 10.1093/dnares/dst008 (PMC3686432; doi:10.1093/dnares/dst008), 2013-03-29
Supplement: supp_dst008_dst008supp.pdf [file supp_dst008_dst008supp.pdf]

## 1 **Supplementary figure legend**

### 3 **Fig. S1. The entire dataset of H-NS and Hha binding signals**

4 The arrangement of genes (thick arrows) on the *E. coli* chromosome is shown at the top  
5 of the figure, and the distributions of the H-NS and Hha binding signals are shown  
6 below the gene arrangement. Red arrows correspond to genes that were up-regulated in  
7 both *hns/stpA* and *hha/ydgT* mutant cells, while green arrows show genes that were  
8 up-regulated in only *hns/stpA* mutant cells. H-NS binding signals in wild-type (W3110)  
9 and *hha/ydgT* mutant cells, as well as Hha binding signals in W3110 pQEHha and  
10 W3110 *hns::Km stpA::Cm* pQE80Hha cells, are shown as the relative ratios of the  
11 signal intensities from the ChIP and Sup fractions in each experiment. Each experiment  
12 was performed in duplicate, and the distributions of binding signals are represented by  
13 two columns, one for each experiment (e.g., wild-1 and wild-2). The H-NS binding  
14 regions in wild-type (W3110) and *hha/ydgT* mutant cells, and the Hha binding regions  
15 in W3110 pQEHha cells (see Materials and Methods) are shown as thick lines with the  
16 gene arrangement. The blue line shows the H-NS binding regions in wild-type cells  
17 (W3110); the purple line shows the H-NS binding regions in *hha/ydgT* mutant cells; the  
18 gray line shows the Hha binding regions in W3110 pQEHha cells; and the black line  
19 shows the H-NS binding regions that were determined by visual inspection. The class of  
20 each H-NS binding region determined by visual inspection is indicated under the black  
21 line by int (intergenic), single (coding [single])” or multiple (coding [multiple]).

### 23 **Fig. S2. Examples of the H-NS binding signals categorized as “intergenic,” “coding 24 (single)” and “coding (multiple)”**

25 Representative examples of the H-NS binding signals categorized as “intergenic” (A

26 and B), “coding (single)” (C and D) and “coding (multiple)” (E and F). Arrows indicate  
27 the H-NS binding peaks (determined by visual inspection) in the “intergenic” and  
28 “coding (single)” H-NS binding regions.

29

30 **Fig. S3. The H-NS and Hha binding signals in and around the genes up-regulated**  
31 **in both *hha/ydgT* and *hns/stpA* mutant cells**

32 H-NS and Hha binding profiles in and around all genes up-regulated in both *hha/ydgT*  
33 mutant and *hns/stpA* mutant cells are shown. The localizations of H-NS binding signals  
34 were classified as “intergenic” (A), “coding (single)” (B), coding (multiple)” (C), and  
35 both “coding” and “intergenic” (D). “Intergenic” and “coding” H-NS binding regions  
36 are shown by red and green boxes, respectively. H-NS and Hha binding signals are  
37 shown as in Fig. S1, except that results of only one experiment for each strain are  
38 shown.

39
