# Supplementary material for: Functions of the Hha and YdgT Proteins in Transcriptional Silencing by the Nucleoid Proteins, H-NS and StpA, in Escherichia coli
Source: PubMed Central journal article supplement — DNA Res. 2013 Mar 29;20(3):263–71. doi: 10.1093/dnares/dst008 (PMC3686432; doi:10.1093/dnares/dst008), 2013-03-29
Supplement: supp_dst008_dst008supp_fig2.pdf [file supp_dst008_dst008supp_fig2.pdf]

Fig.S2. Examples of H-NS binding signals categorized as “intergenic,” “coding (single)” and “coding (multiple)”

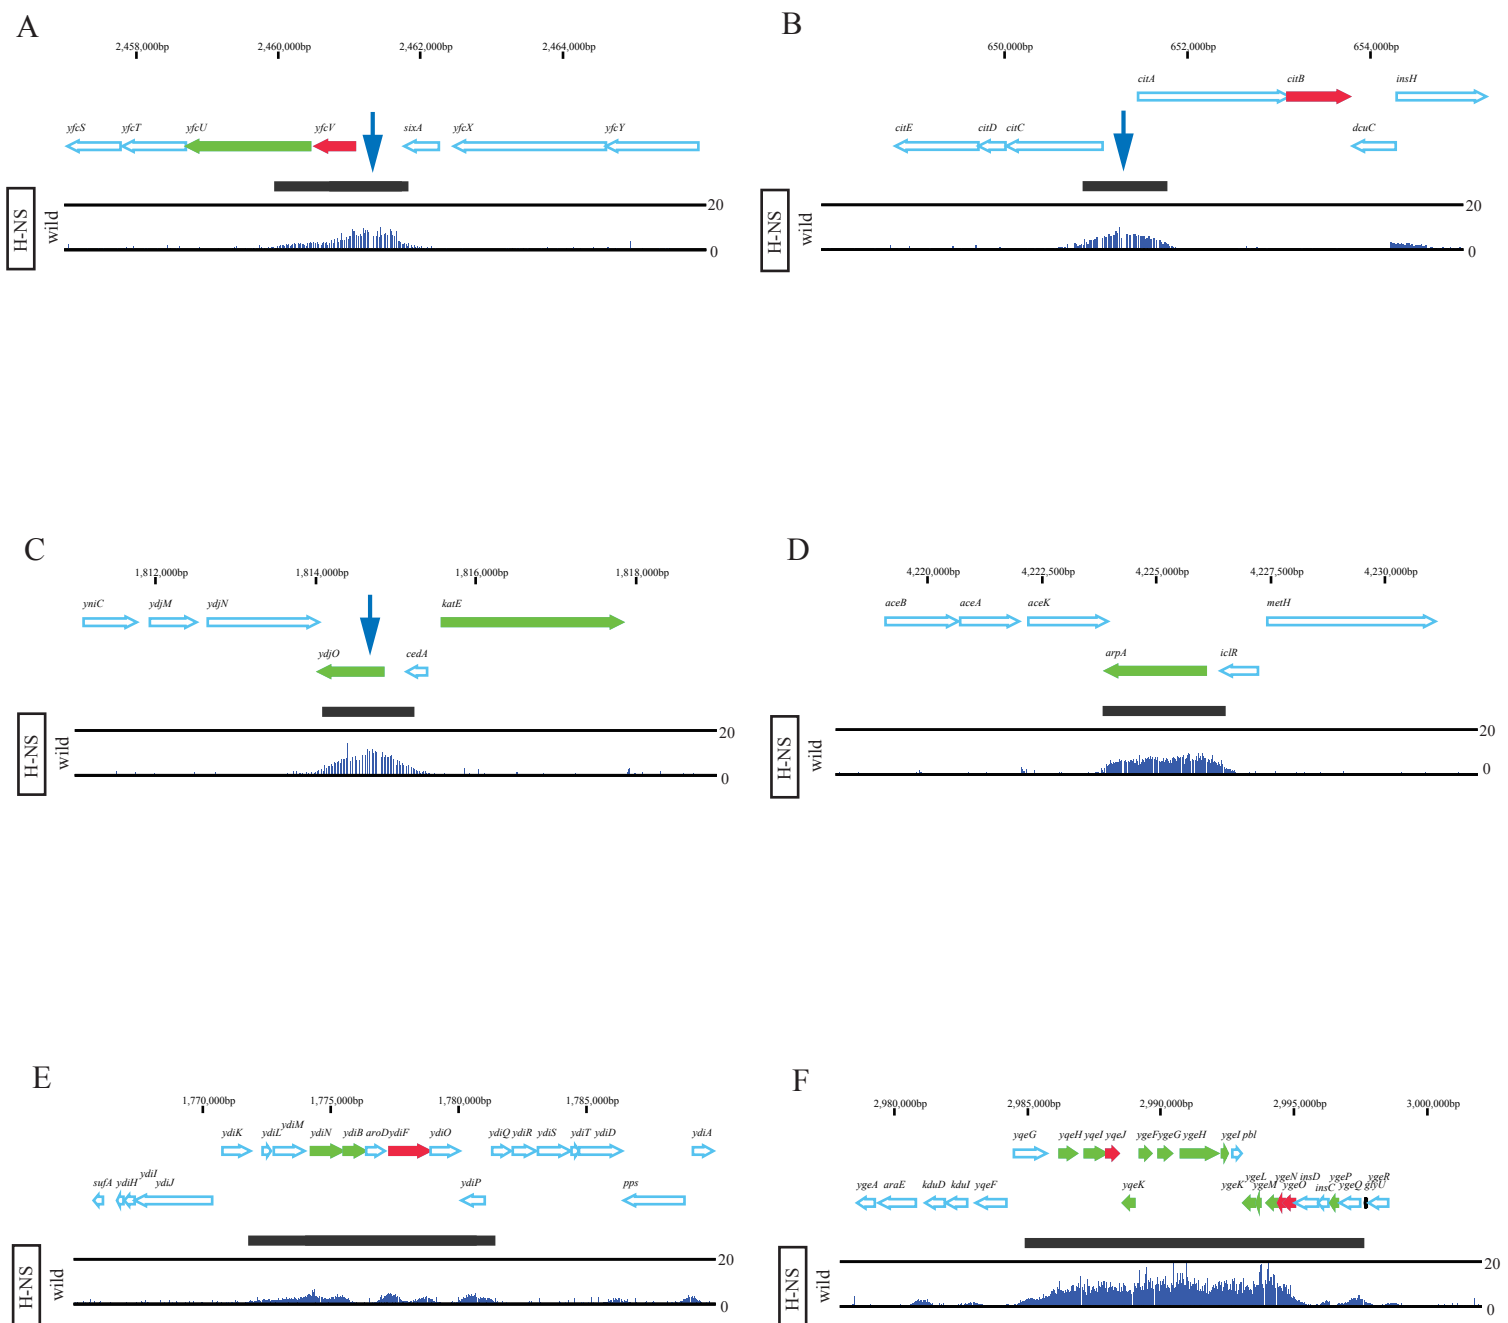

Fig. S2. Examples of the H-NS binding signals categorized as “intergenic,” “coding (single)” and “coding (multiple)”

Representative examples of the H-NS binding signals categorized as “intergenic” (A and B), “coding (single)” (C and D) and “coding (multiple)” (E and F).

Arrows indicate the H-NS binding peaks (determined by visual inspection) in the “intergenic” and “coding (single)” H-NS binding regions.
