# Supplementary material for: Functions of the Hha and YdgT Proteins in Transcriptional Silencing by the Nucleoid Proteins, H-NS and StpA, in Escherichia coli
Source: PubMed Central journal article supplement — DNA Res. 2013 Mar 29;20(3):263–71. doi: 10.1093/dnares/dst008 (PMC3686432; doi:10.1093/dnares/dst008), 2013-03-29
Supplement: supp_dst008_dst008supp_fig3.pdf [file supp_dst008_dst008supp_fig3.pdf]

Fig.S3A. continued

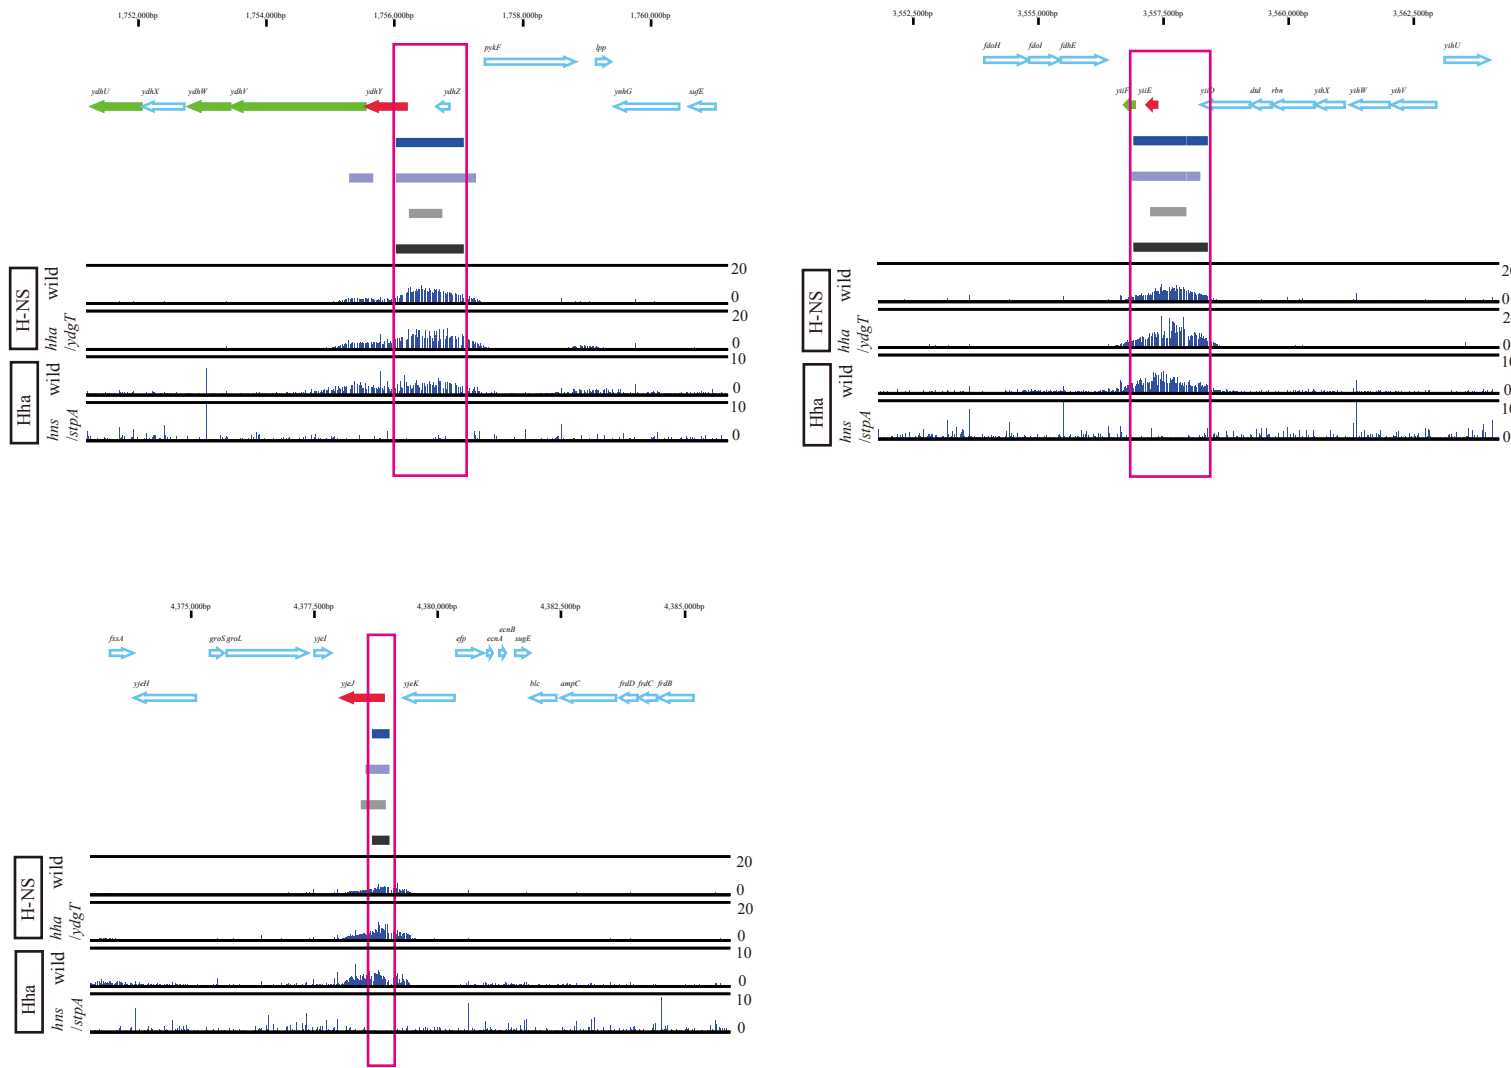

Fig.S3-2

Fig.S3B. H-NS binding on single “coding” sequence

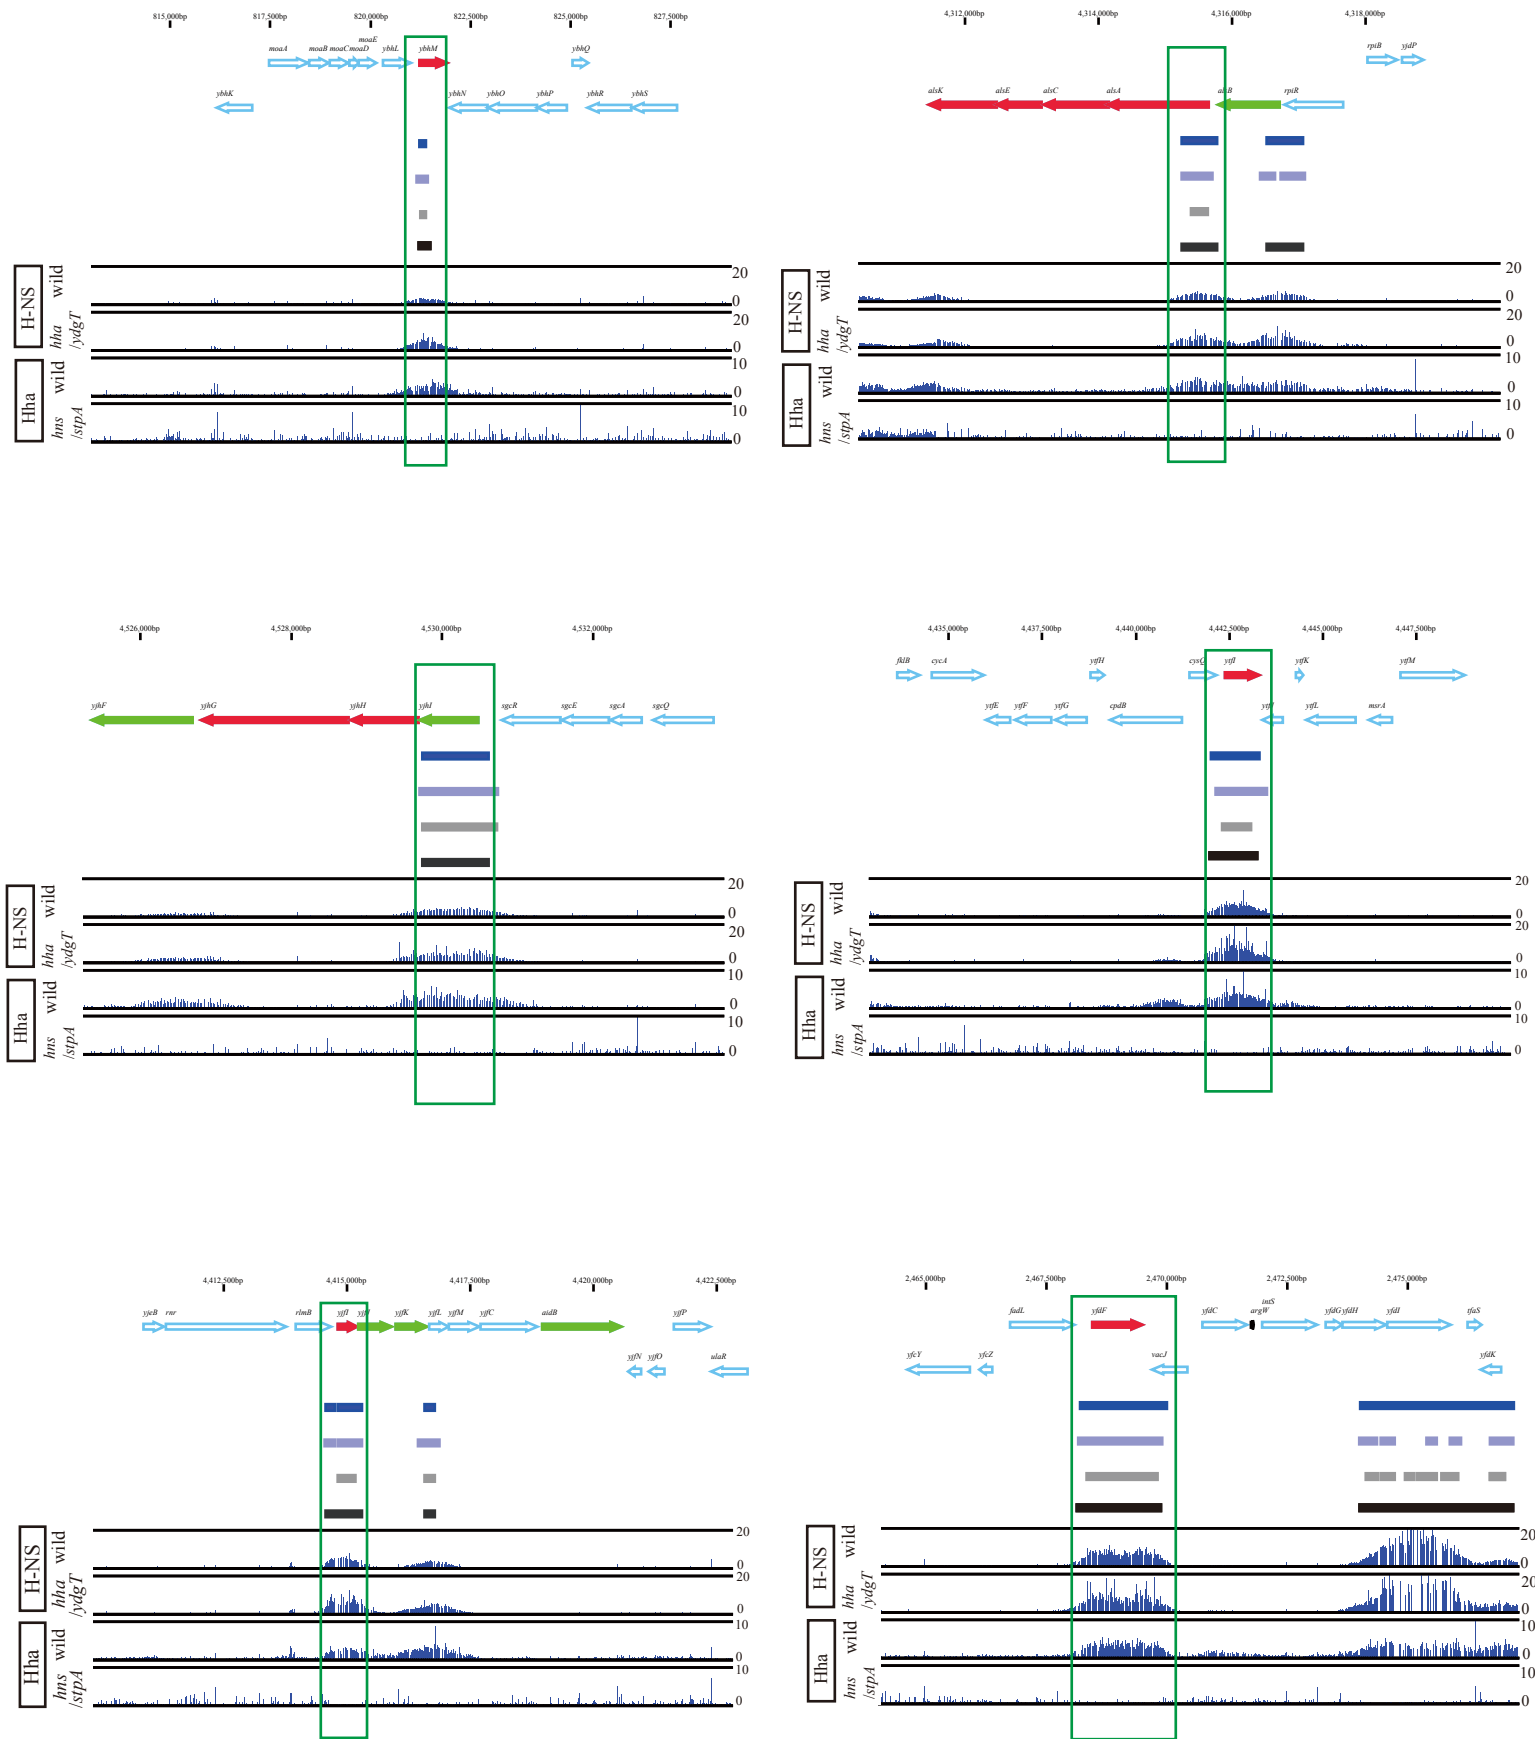

Fig.S3-3













Fig.S3D. H-NS binding on both “intergenic” region and “coding” sequence

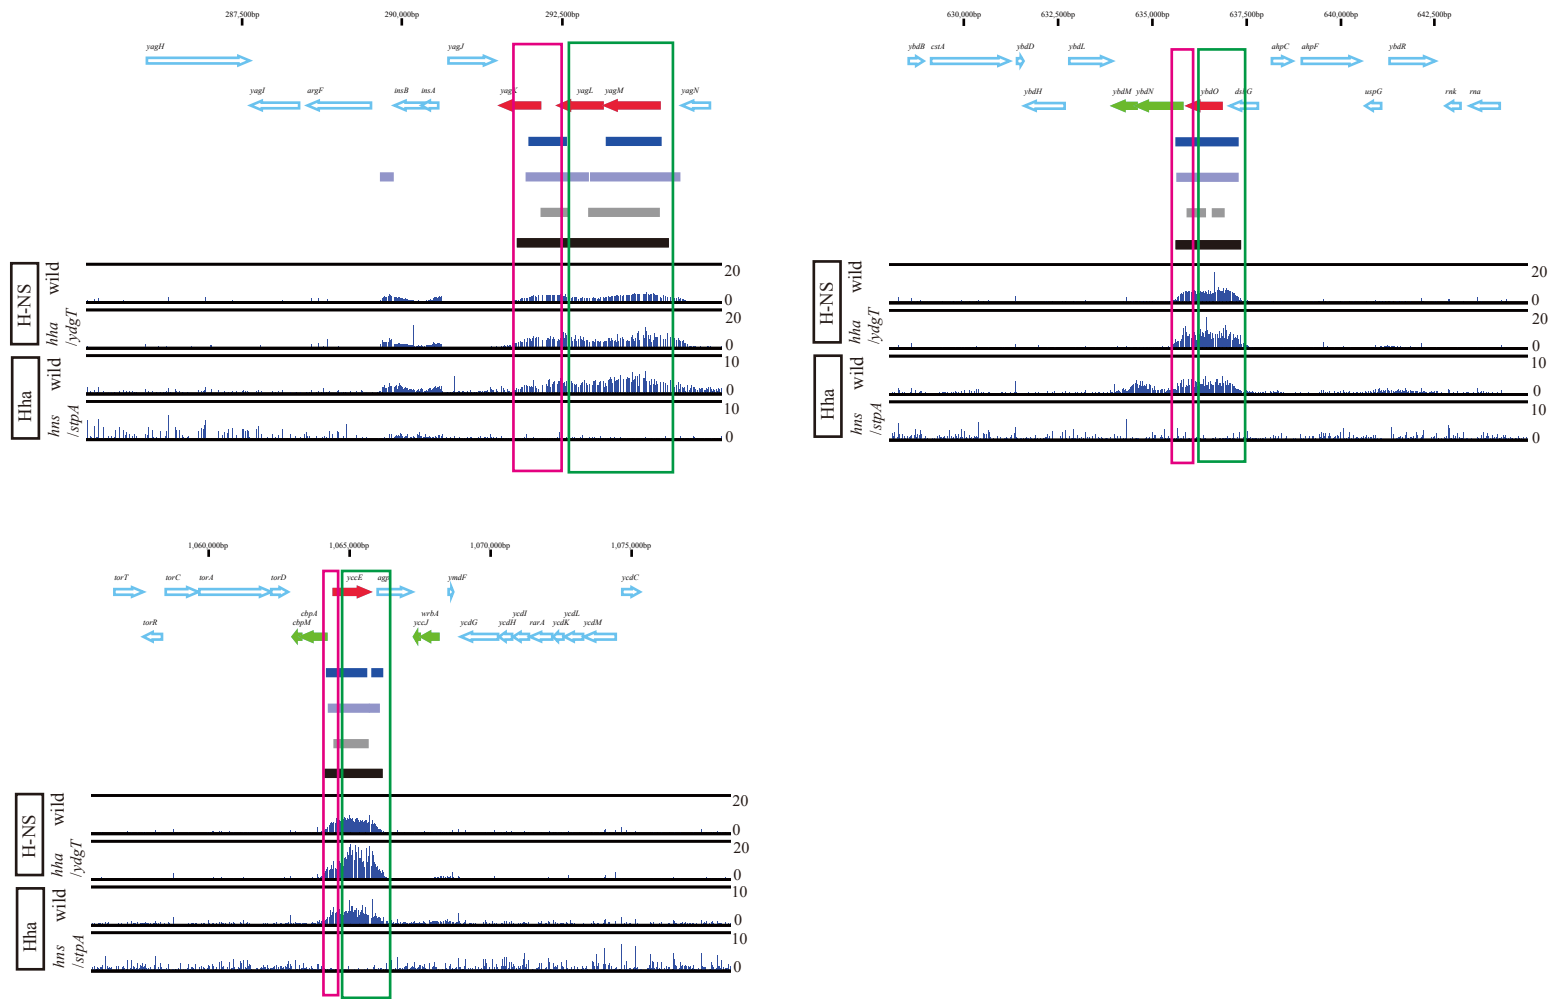

Fig. S3. The H-NS and Hha binding signals in and around the genes up-regulated in both *hha/ydgT* and *hns/stpA* mutant cells

H-NS and Hha binding profiles in and around all genes up-regulated in both *hha/ydgT* mutant and *hns/stpA* mutant cells are shown. The localizations of H-NS binding signals were classified as “intergenic” (A), “coding (single)” (B), coding (multiple)” (C), and both “coding” and “intergenic” (D).

“Intergenic” and “coding” H-NS binding regions are shown by red and green boxes, respectively.

H-NS and Hha binding signals are shown as in Fig. S1, except that results of only one experiment for each strain are shown.
